# Supplementary material for: The Use of Triaxial Accelerometers and Machine Learning Algorithms for Behavioural Identification in Domestic Cats (Felis catus): A Validation Study
Source: MDPI journal article supplement (doi:10.3390/s23167165), 2023-08-14
Supplement: s1 [file s1]

## Supplementary Material 4 – Sensitivities of identification models

**Table S25.** Sensitivity for modelling round 1. CRF = Collar Random Forest, HRF = Harness Random Forest, CSOM = Collar Self-Organizing Map, HSOM = Harness Self-Organizing Map.

|              | CRF   | HRF   | CSOM  | HSOM  |
|--------------|-------|-------|-------|-------|
| Climbing     | 0.000 | 0.111 | 0.000 | 0.000 |
| Jumping      | 0.056 | 0.056 | 0.000 | 0.000 |
| Rubbing      | 0.136 | 0.476 | 0.612 | 0.986 |
| Trotting     | 0.022 | 0.022 | 0.707 | 0.435 |
| Walking      | 0.508 | 0.648 | 1.000 | 0.990 |
| Lying        | 0.883 | 0.947 | 1.000 | 1.000 |
| Sitting      | 0.731 | 0.815 | 0.998 | 0.999 |
| Standing     | 0.586 | 0.584 | 0.995 | 0.992 |
| Grooming     | 0.727 | 0.839 | 0.999 | 0.999 |
| Littering    | 0.354 | 0.354 | 0.865 | 0.542 |
| Digging      | 0.000 | 0.141 | 0.000 | 0.958 |
| Eating       | 0.863 | 0.933 | 1.000 | 0.999 |
| Scratching   | 0.462 | 0.448 | 0.793 | 0.524 |
| Shaking      | 0.053 | 0.027 | 0.389 | 0.283 |
| Allogrooming | 0.000 | 0.069 | 0.000 | 0.000 |

**Table S26.** Sensitivity for modelling round 2. CRF = Collar Random Forest, HRF = Harness Random Forest, CSOM = Collar Self-Organizing Map, HSOM = Harness Self-Organizing Map.

|            | CRF   | HRF   | CSOM  | HSOM  |
|------------|-------|-------|-------|-------|
| Active     | 0.522 | 0.639 | 1.000 | 0.988 |
| Lying      | 0.886 | 0.956 | 1.000 | 1.000 |
| Sitting    | 0.740 | 0.805 | 0.999 | 1.000 |
| Standing   | 0.584 | 0.585 | 0.994 | 0.995 |
| Grooming   | 0.739 | 0.838 | 0.999 | 1.000 |
| Littering  | 0.375 | 0.417 | 0.979 | 1.000 |
| Eating     | 0.867 | 0.920 | 1.000 | 0.999 |
| Scratching | 0.448 | 0.407 | 0.903 | 0.938 |

**Table S27.** Sensitivity for modelling round 3. CRF = Collar Random Forest, HRF = Harness Random Forest, CSOM = Collar Self-Organizing Map, HSOM = Harness Self-Organizing Map.

|          | CRF   | HRF   | CSOM  | HSOM  |
|----------|-------|-------|-------|-------|
| Active   | 0.539 | 0.652 | 0.881 | 0.996 |
| Lying    | 0.890 | 0.951 | 0.935 | 1.000 |
| Sitting  | 0.735 | 0.785 | 0.997 | 0.999 |
| Standing | 0.560 | 0.576 | 0.989 | 0.991 |
| Grooming | 0.752 | 0.835 | 0.931 | 1.000 |
| Eating   | 0.868 | 0.926 | 1.000 | 1.000 |

**Table S28.** Sensitivity for modelling round 4. CRF = Collar Random Forest, HRF = Harness Random Forest, CSOM = Collar Self-Organizing Map, HSOM = Harness Self-Organizing Map.

|             | CRF   | HRF   | CSOM  | HSOM  |
|-------------|-------|-------|-------|-------|
| Active      | 0.807 | 0.788 | 0.997 | 0.997 |
| Inactive    | 0.837 | 0.858 | 1.000 | 1.000 |
| Maintenance | 0.839 | 0.829 | 1.000 | 0.999 |
