# Supplementary material for: The Use of Triaxial Accelerometers and Machine Learning Algorithms for Behavioural Identification in Domestic Cats (Felis catus): A Validation Study
Source: MDPI journal article supplement (doi:10.3390/s23167165), 2023-08-14
Supplement: s1 [file s1]

### Supplementary Material 1 – Confusion matrices of identification models

**Table S1.** Confusion matrix for modelling round 1 of the collar-mounted data using a Random Forest model. Numbers along the diagonal represent the true positive (TP) value. Pred = identified behaviour, Ob = observed behaviour.

[illegible]

**Table S2.** Confusion matrix for modelling round 1 of the harness-mounted data using a Random Forest model. Numbers along the diagonal represent the true positive (TP) value. Pred = identified behaviour, Ob = observed behaviour.

[illegible]

**Table S3.** Confusion matrix for modelling round 1 of the collar-mounted data using a Self-Organizing Map model. Numbers along the diagonal represent the true positive (TP) value. Pred = identified behaviour, Ob = observed behaviour.

[illegible]

**Table S4.** Confusion matrix for modelling round 1 of the harness-mounted data using a Self-Organizing Map model. Numbers along the diagonal represent the true positive (TP) value. Pred = identified behaviour, Ob = observed behaviour.

[illegible]

**Table S5.** Confusion matrix for modelling round 2 of the collar data using a Random Forest model. Numbers along the diagonal represent the true positive (TP) value. Pred = identified behaviour, Ob = observed behaviour.

| Pred \ Ob  | Active | Lying | Sitting | Standing | Grooming | Littering | Eating | Scratching |
|------------|--------|-------|---------|----------|----------|-----------|--------|------------|
| Active     | 596    | 2     | 12      | 231      | 45       | 4         | 38     | 20         |
| Lying      | 13     | 1861  | 187     | 106      | 41       | 8         | 8      | 3          |
| Sitting    | 36     | 125   | 1554    | 159      | 75       | 19        | 5      | 3          |
| Standing   | 220    | 85    | 235     | 1226     | 122      | 18        | 83     | 19         |
| Grooming   | 164    | 11    | 84      | 220      | 1573     | 3         | 140    | 34         |
| Littering  | 0      | 1     | 3       | 3        | 0        | 36        | 0      | 0          |
| Eating     | 107    | 15    | 24      | 152      | 272      | 8         | 1784   | 1          |
| Scratching | 6      | 0     | 1       | 3        | 1        | 0         | 0      | 65         |

**Table S6.** Confusion matrix for modelling round 2 of the harness data using a Random Forest model. Numbers along the diagonal represent the true positive (TP) value. Pred = identified behaviour, Ob = observed behaviour.

| Pred \ Ob  | Active | Lying | Sitting | Standing | Grooming | Littering | Eating | Scratching |
|------------|--------|-------|---------|----------|----------|-----------|--------|------------|
| Active     | 730    | 3     | 21      | 339      | 35       | 9         | 26     | 29         |
| Lying      | 20     | 2007  | 25      | 54       | 10       | 7         | 17     | 1          |
| Sitting    | 32     | 12    | 1690    | 112      | 76       | 11        | 0      | 1          |
| Standing   | 229    | 59    | 241     | 1228     | 159      | 22        | 76     | 17         |
| Grooming   | 99     | 15    | 117     | 265      | 1784     | 6         | 46     | 38         |
| Littering  | 0      | 1     | 3       | 6        | 0        | 40        | 0      | 0          |
| Eating     | 29     | 3     | 3       | 96       | 61       | 1         | 1893   | 0          |
| Scratching | 3      | 0     | 0       | 0        | 4        | 0         | 0      | 59         |

**Table S7.** Confusion matrix for modelling round 2 of the collar data using a Self-Organizing Map model. Numbers along the diagonal represent the true positive (TP) value. Pred = identified behaviour, Ob = observed behaviour.

| Pred \ Ob  | Active | Lying | Sitting | Standing | Grooming | Littering | Eating | Scratching |
|------------|--------|-------|---------|----------|----------|-----------|--------|------------|
| Active     | 1142   | 0     | 3       | 13       | 2        | 1         | 0      | 4          |
| Lying      | 0      | 2100  | 0       | 0        | 0        | 0         | 0      | 3          |
| Sitting    | 0      | 0     | 2097    | 0        | 0        | 0         | 0      | 2          |
| Standing   | 0      | 0     | 0       | 2087     | 0        | 0         | 0      | 2          |
| Grooming   | 0      | 0     | 0       | 0        | 2127     | 0         | 0      | 3          |
| Littering  | 0      | 0     | 0       | 0        | 0        | 94        | 0      | 0          |
| Eating     | 0      | 0     | 0       | 0        | 0        | 1         | 2058   | 0          |
| Scratching | 0      | 0     | 0       | 0        | 0        | 0         | 0      | 131        |

**Table S8.** Confusion matrix for modelling round 2 of the harness data using a Self-Organizing Map model. Numbers along the diagonal represent the true positive (TP) value. Pred = identified behaviour, Ob = observed behaviour.

| Pred \ Ob  | Active | Lying | Sitting | Standing | Grooming | Littering | Eating | Scratching |
|------------|--------|-------|---------|----------|----------|-----------|--------|------------|
| Active     | 1128   | 0     | 0       | 11       | 0        | 0         | 2      | 1          |
| Lying      | 0      | 2100  | 0       | 0        | 0        | 0         | 0      | 0          |
| Sitting    | 0      | 0     | 2099    | 0        | 0        | 0         | 0      | 1          |
| Standing   | 14     | 0     | 1       | 2089     | 1        | 0         | 0      | 0          |
| Grooming   | 0      | 0     | 0       | 0        | 2128     | 0         | 0      | 7          |
| Littering  | 0      | 0     | 0       | 0        | 0        | 96        | 0      | 0          |
| Eating     | 0      | 0     | 0       | 0        | 0        | 0         | 2056   | 0          |
| Scratching | 0      | 0     | 0       | 0        | 0        | 0         | 0      | 136        |

**Table S9.** Confusion matrix for modelling round 3 of the collar data using a Random Forest model. Numbers along the diagonal represent the true positive (TP) value. Pred = identified behaviour, Ob = observed behaviour.

| Pred \ Ob | Active | Lying | Sitting | Standing | Grooming | Eating |
|-----------|--------|-------|---------|----------|----------|--------|
| Active    | 615    | 1     | 17      | 240      | 66       | 45     |
| Lying     | 17     | 1870  | 223     | 112      | 44       | 10     |
| Sitting   | 44     | 110   | 1543    | 174      | 64       | 9      |
| Standing  | 205    | 91    | 234     | 1175     | 151      | 79     |
| Grooming  | 191    | 12    | 66      | 241      | 1709     | 129    |
| Eating    | 70     | 16    | 17      | 158      | 240      | 1786   |

**Table S10. Confusion matrix for modelling round 3 of the harness data using a Random Forest model.** Numbers along the diagonal represent the true positive (TP) value. Pred = identified behaviour, Ob = observed behaviour.

| Pred \ Ob | Active | Lying | Sitting | Standing | Grooming | Eating |
|-----------|--------|-------|---------|----------|----------|--------|
| Active    | 745    | 2     | 21      | 328      | 50       | 26     |
| Lying     | 9      | 1997  | 33      | 70       | 14       | 10     |
| Sitting   | 32     | 17    | 1648    | 127      | 75       | 0      |
| Standing  | 214    | 59    | 274     | 1209     | 173      | 79     |
| Grooming  | 103    | 20    | 120     | 252      | 1898     | 37     |
| Eating    | 39     | 5     | 4       | 114      | 64       | 1906   |

**Table S11. Confusion matrix for modelling round 3 of the collar data using a Self-Organizing Map model.** Numbers along the diagonal represent the true positive (TP) value. Pred = identified behaviour, Ob = observed behaviour.

| Pred \ Ob | Active | Lying | Sitting | Standing | Grooming | Eating |
|-----------|--------|-------|---------|----------|----------|--------|
| Active    | 1006   | 1     | 4       | 15       | 2        | 0      |
| Lying     | 0      | 1964  | 0       | 0        | 0        | 0      |
| Sitting   | 0      | 0     | 2093    | 0        | 0        | 0      |
| Standing  | 0      | 1     | 0       | 2077     | 0        | 0      |
| Grooming  | 0      | 0     | 0       | 0        | 2118     | 0      |
| Eating    | 136    | 134   | 3       | 8        | 154      | 2058   |

**Table S12. Confusion matrix for modelling round 3 of the harness data using a Self-Organizing Map model.** Numbers along the diagonal represent the true positive (TP) value. Pred = identified behaviour, Ob = observed behaviour.

| Pred \ Ob | Active | Lying | Sitting | Standing | Grooming | Eating |
|-----------|--------|-------|---------|----------|----------|--------|
| Active    | 1137   | 0     | 3       | 17       | 1        | 0      |
| Lying     | 0      | 2100  | 0       | 0        | 0        | 0      |
| Sitting   | 1      | 0     | 2097    | 0        | 0        | 0      |
| Standing  | 0      | 0     | 0       | 2081     | 0        | 0      |
| Grooming  | 0      | 0     | 0       | 0        | 2273     | 0      |
| Eating    | 4      | 0     | 0       | 2        | 0        | 2058   |

**Table S13. Confusion matrix for modelling round 3 of the collar data using a Random Forest model.** Numbers along the diagonal represent the true positive (TP) value. Pred = identified behaviour, Ob = observed behaviour.

| Pred \ Ob   | Active | Inactive | Maintenance |
|-------------|--------|----------|-------------|
| Active      | 905    | 147      | 69          |
| Inactive    | 125    | 1211     | 111         |
| Maintenance | 112    | 142      | 1320        |

**Table S14. Confusion matrix for modelling round 3 of the harness data using a Random Forest model.** Numbers along the diagonal represent the true positive (TP) value. Pred = identified behaviour, Ob = observed behaviour.

| Pred \ Ob   | Active | Inactive | Maintenance |
|-------------|--------|----------|-------------|
| Active      | 901    | 158      | 85          |
| Inactive    | 112    | 1196     | 86          |
| Maintenance | 129    | 146      | 1329        |

**Table S15. Confusion matrix for modelling round 3 of the collar data using a Self-Organizing Map model.** Numbers along the diagonal represent the true positive (TP) value. Pred = identified behaviour, Ob = observed behaviour.

| Pred \ Ob   | Active | Inactive | Maintenance |
|-------------|--------|----------|-------------|
| Active      | 1142   | 1        | 2           |
| Inactive    | 0      | 1499     | 0           |
| Maintenance | 0      | 0        | 1498        |

**Table S16.** Confusion matrix for modelling round 3 of the harness data using a Self-Organizing Map model. Numbers along the diagonal represent the true positive (TP) value. Pred = identified behaviour, Ob = observed behaviour.

| Pred \ Ob   | Active | Inactive | Maintenance |
|-------------|--------|----------|-------------|
| Active      | 1142   | 2        | 1           |
| Inactive    | 0      | 1497     | 0           |
| Maintenance | 0      | 1        | 1499        |
