# Supplementary material for: The Use of Triaxial Accelerometers and Machine Learning Algorithms for Behavioural Identification in Domestic Cats (Felis catus): A Validation Study
Source: MDPI journal article supplement (doi:10.3390/s23167165), 2023-08-14
Supplement: s1 [file s1]

## Supplementary Material 2 – Accuracies of identification models

**Table S17.** Accuracy for modelling round 1. CRF = Collar Random Forest, HRF = Harness Random Forest, CSOM = Collar Self-Organizing Map, HSOM = Harness Self-Organizing Map.

|              | CRF   | HRF   | CSOM  | HSOM  |
|--------------|-------|-------|-------|-------|
| Climbing     | 0.999 | 0.999 | 0.999 | 0.999 |
| Jumping      | 0.994 | 0.994 | 0.994 | 0.994 |
| Rubbing      | 0.989 | 0.989 | 0.987 | 1.000 |
| Trotting     | 0.992 | 0.992 | 0.983 | 0.992 |
| Walking      | 0.919 | 0.928 | 0.997 | 0.996 |
| Lying        | 0.949 | 0.980 | 1.000 | 1.000 |
| Sitting      | 0.917 | 0.943 | 1.000 | 1.000 |
| Standing     | 0.854 | 0.861 | 0.999 | 0.997 |
| Grooming     | 0.891 | 0.921 | 0.999 | 0.999 |
| Littering    | 0.994 | 0.994 | 0.999 | 0.990 |
| Digging      | 0.994 | 0.995 | 0.994 | 1.000 |
| Eating       | 0.923 | 0.966 | 1.000 | 0.999 |
| Scratching   | 0.992 | 0.993 | 0.998 | 0.985 |
| Shaking      | 0.990 | 0.991 | 0.990 | 0.987 |
| Allogrooming | 0.998 | 0.998 | 0.998 | 0.998 |

**Table S18.** Accuracy for modelling round 2. CRF = Collar Random Forest, HRF = Harness Random Forest, CSOM = Collar Self-Organizing Map, HSOM = Harness Self-Organizing Map.

|            | CRF   | HRF   | CSOM  | HSOM  |
|------------|-------|-------|-------|-------|
| Active     | 0.924 | 0.926 | 0.998 | 0.998 |
| Lying      | 0.949 | 0.981 | 1.000 | 1.000 |
| Sitting    | 0.918 | 0.945 | 1.000 | 1.000 |
| Standing   | 0.860 | 0.859 | 0.999 | 0.998 |
| Grooming   | 0.898 | 0.922 | 1.000 | 0.999 |
| Littering  | 0.994 | 0.994 | 1.000 | 1.000 |
| Eating     | 0.928 | 0.970 | 1.000 | 1.000 |
| Scratching | 0.992 | 0.992 | 0.999 | 0.999 |

**Table S19.** Accuracy for modelling round 3. CRF = Collar Random Forest, HRF = Harness Random Forest, CSOM = Collar Self-Organizing Map, HSOM = Harness Self-Organizing Map.

|          | CRF   | HRF   | CSOM  | HSOM  |
|----------|-------|-------|-------|-------|
| Active   | 0.924 | 0.930 | 0.987 | 0.998 |
| Lying    | 0.946 | 0.980 | 0.988 | 1.000 |
| Sitting  | 0.919 | 0.940 | 0.999 | 1.000 |
| Standing | 0.857 | 0.856 | 0.998 | 0.998 |
| Grooming | 0.903 | 0.948 | 0.987 | 1.000 |
| Eating   | 0.746 | 0.790 | 0.963 | 0.999 |

**Table S20.** Accuracy for modelling round 4. CRF = Collar Random Forest, HRF = Harness Random Forest, CSOM = Collar Self-Organizing Map, HSOM = Harness Self-Organizing Map.

|             | CRF   | HRF   | CSOM  | HSOM  |
|-------------|-------|-------|-------|-------|
| Active      | 0.891 | 0.883 | 0.999 | 0.999 |
| Inactive    | 0.873 | 0.879 | 1.000 | 0.999 |
| Maintenance | 0.895 | 0.892 | 1.000 | 1.000 |
