# Supplementary material for: The Use of Triaxial Accelerometers and Machine Learning Algorithms for Behavioural Identification in Domestic Cats (Felis catus): A Validation Study
Source: MDPI journal article supplement (doi:10.3390/s23167165), 2023-08-14
Supplement: s1 [file s1]

## Supplementary Material 5 – Specificities of identification models

**Table S29.** Specificity for modelling round 1. CRF = Collar Random Forest, HRF = Harness Random Forest, CSOM = Collar Self-Organizing Map, HSOM = Harness Self-Organizing Map.

|              | CRF   | HRF   | CSOM  | HSOM  |
|--------------|-------|-------|-------|-------|
| Climbing     | 1.000 | 1.000 | 1.000 | 1.000 |
| Jumping      | 1.000 | 0.999 | 1.000 | 1.000 |
| Rubbing      | 1.000 | 0.995 | 0.991 | 1.000 |
| Trotting     | 1.000 | 1.000 | 0.985 | 0.996 |
| Walking      | 0.958 | 0.954 | 0.996 | 0.997 |
| Lying        | 0.962 | 0.986 | 1.000 | 1.000 |
| Sitting      | 0.955 | 0.969 | 1.000 | 1.000 |
| Standing     | 0.909 | 0.918 | 1.000 | 0.998 |
| Grooming     | 0.925 | 0.938 | 0.999 | 1.000 |
| Littering    | 0.999 | 0.999 | 1.000 | 0.993 |
| Digging      | 1.000 | 1.000 | 1.000 | 1.000 |
| Eating       | 0.936 | 0.973 | 1.000 | 0.999 |
| Scratching   | 0.999 | 0.999 | 1.000 | 0.990 |
| Shaking      | 0.999 | 1.000 | 0.995 | 0.993 |
| Allogrooming | 1.000 | 1.000 | 1.000 | 1.000 |

**Table S30.** Specificity for modelling round 2. CRF = Collar Random Forest, HRF = Harness Random Forest, CSOM = Collar Self-Organizing Map, HSOM = Harness Self-Organizing Map.

|            | CRF   | HRF   | CSOM  | HSOM  |
|------------|-------|-------|-------|-------|
| Active     | 0.967 | 0.957 | 0.998 | 0.999 |
| Lying      | 0.963 | 0.986 | 1.000 | 1.000 |
| Sitting    | 0.957 | 0.975 | 1.000 | 1.000 |
| Standing   | 0.920 | 0.918 | 1.000 | 0.998 |
| Grooming   | 0.933 | 0.940 | 1.000 | 0.999 |
| Littering  | 0.999 | 0.999 | 1.000 | 1.000 |
| Eating     | 0.941 | 0.980 | 1.000 | 1.000 |
| Scratching | 0.999 | 0.999 | 1.000 | 1.000 |

**Table S31.** Specificity for modelling round 3. CRF = Collar Random Forest, HRF = Harness Random Forest, CSOM = Collar Self-Organizing Map, HSOM = Harness Self-Organizing Map.

|          | CRF   | HRF   | CSOM  | HSOM  |
|----------|-------|-------|-------|-------|
| Active   | 0.965 | 0.960 | 0.998 | 0.998 |
| Lying    | 0.958 | 0.986 | 1.000 | 1.000 |
| Sitting  | 0.959 | 0.974 | 1.000 | 1.000 |
| Standing | 0.921 | 0.917 | 1.000 | 1.000 |
| Grooming | 0.939 | 0.975 | 1.000 | 1.000 |
| Eating   | 0.720 | 0.761 | 0.955 | 0.999 |

**Table S32.** Specificity for modelling round 4. CRF = Collar Random Forest, HRF = Harness Random Forest, CSOM = Collar Self-Organizing Map, HSOM = Harness Self-Organizing Map.

|             | CRF   | HRF   | CSOM  | HSOM  |
|-------------|-------|-------|-------|-------|
| Active      | 0.928 | 0.919 | 0.999 | 0.999 |
| Inactive    | 0.911 | 0.925 | 1.000 | 1.000 |
| Maintenance | 0.904 | 0.896 | 1.000 | 1.000 |
