# Supplementary material for: The Use of Triaxial Accelerometers and Machine Learning Algorithms for Behavioural Identification in Domestic Cats (Felis catus): A Validation Study
Source: MDPI journal article supplement (doi:10.3390/s23167165), 2023-08-14
Supplement: s1 [file s1]

### Supplementary Material 3 – Precisions of identification models

**Table S21.** Precision for modelling round 1. CRF = Collar Random Forest, HRF = Harness Random Forest, CSOM = Collar Self-Organizing Map, HSOM = Harness Self-Organizing Map, N/A = not available.

|              | CRF   | HRF   | CSOM  | HSOM  |
|--------------|-------|-------|-------|-------|
| Climbing     | N/A   | 0.250 | N/A   | N/A   |
| Jumping      | 0.800 | 0.286 | N/A   | N/A   |
| Rubbing      | 0.833 | 0.526 | 0.455 | 1.000 |
| Trotting     | 0.500 | 0.500 | 0.269 | 0.455 |
| Walking      | 0.528 | 0.571 | 0.962 | 0.969 |
| Lying        | 0.830 | 0.934 | 1.000 | 0.999 |
| Sitting      | 0.772 | 0.845 | 1.000 | 1.000 |
| Standing     | 0.572 | 0.595 | 0.999 | 0.990 |
| Grooming     | 0.668 | 0.737 | 0.997 | 0.998 |
| Littering    | 0.829 | 0.810 | 1.000 | 0.394 |
| Digging      | N/A   | 0.714 | N/A   | 1.000 |
| Eating       | 0.730 | 0.874 | 1.000 | 0.997 |
| Scratching   | 0.788 | 0.878 | 1.000 | 0.394 |
| Shaking      | 0.333 | 1.000 | 0.427 | 0.283 |
| Allogrooming | N/A   | 1.000 | N/A   | N/A   |

**Table S22.** Precision for modelling round 2. CRF = Collar Random Forest, HRF = Harness Random Forest, CSOM = Collar Self-Organizing Map, HSOM = Harness Self-Organizing Map, N/A = not available.

|            | CRF   | HRF   | CSOM  | HSOM  |
|------------|-------|-------|-------|-------|
| Active     | 0.629 | 0.612 | 0.980 | 0.988 |
| Lying      | 0.836 | 0.937 | 0.999 | 1.000 |
| Sitting    | 0.786 | 0.874 | 0.999 | 1.000 |
| Standing   | 0.611 | 0.605 | 0.999 | 0.992 |
| Grooming   | 0.706 | 0.753 | 0.999 | 0.997 |
| Littering  | 0.837 | 0.800 | 1.000 | 1.000 |
| Eating     | 0.755 | 0.907 | 1.000 | 1.000 |
| Scratching | 0.855 | 0.894 | 1.000 | 1.000 |

**Table S23.** Precision for modelling round 3. CRF = Collar Random Forest, HRF = Harness Random Forest, CSOM = Collar Self-Organizing Map, HSOM = Harness Self-Organizing Map.

|          | CRF   | HRF   | CSOM  | HSOM  |
|----------|-------|-------|-------|-------|
| Active   | 0.625 | 0.636 | 0.979 | 0.982 |
| Lying    | 0.822 | 0.936 | 1.000 | 1.000 |
| Sitting  | 0.794 | 0.868 | 1.000 | 1.000 |
| Standing | 0.607 | 0.602 | 1.000 | 1.000 |
| Grooming | 0.747 | 0.890 | 1.000 | 1.000 |
| Eating   | 0.397 | 0.451 | 0.826 | 0.997 |

**Table S24.** Precision for modelling round 3. CRF = Collar Random Forest, HRF = Harness Random Forest, CSOM = Collar Self-Organizing Map, HSOM = Harness Self-Organizing Map.

|             | CRF   | HRF   | CSOM  | HSOM  |
|-------------|-------|-------|-------|-------|
| Active      | 0.807 | 0.788 | 0.997 | 0.997 |
| Inactive    | 0.837 | 0.858 | 1.000 | 1.000 |
| Maintenance | 0.839 | 0.829 | 1.000 | 0.999 |
